# Supplementary material for: Albumin–Hyaluronan Interactions: Influence of Ionic Composition Probed by Molecular Dynamics
Source: MDPI journal article supplement (doi:10.3390/ijms222212360), 2021-11-16
Supplement: s1 [file s1]

## Supplementary Materials

### Albumin – Hyaluronan interactions: influence of ionic composition probed by molecular dynamics

Piotr Beldowski<sup>1,2</sup>, Maciej Przybyłek<sup>3</sup>, Przemysław Raczyński<sup>4</sup>, Andra Dedinaite<sup>2,5</sup>, Krzysztof Górny<sup>4</sup>, D.C. Florian Wieland<sup>6</sup>,  
Zbigniew Dendzik<sup>4</sup>, Alina Sionkowska<sup>7</sup> and Per M. Claesson<sup>8</sup>

<sup>1</sup> Institute of Mathematics & Physics, UTP University of Science & Technology, 85-796 Bydgoszcz, Poland; piotr.beldowski@utp.edu.pl

<sup>2</sup> KTH Royal Institute of Technology, School of Engineering Sciences in Chemistry, Biotechnology and Health, Engineering Pedagogics, SE-100 44 Stockholm, Sweden.; [andra@kth.se](mailto:andra@kth.se)

<sup>3</sup> Department of Physical Chemistry, Pharmacy Faculty, Collegium Medicum of Bydgoszcz, Nicolaus Copernicus University in Toruń, Kurpińskiego 5, 85-950 Bydgoszcz, Poland; [m.przybylek@cm.umk.pl](mailto:m.przybylek@cm.umk.pl)

<sup>4</sup> University of Silesia in Katowice, Faculty of Science and Technology, 75 Pułku Piechoty 1A, 41-500 Chorzow, Poland; krzysztof.gorny@us.edu.pl (K.G); zbigniew.dendzik@us.edu.pl (Z.D.)

<sup>5</sup> RISE Research Institutes of Sweden, Division of Bioscience and Materials, SE-114 86 Stockholm, Sweden

<sup>6</sup> Helmholtz-Zentrum hereon: Institute for metallic Biomaterials, Max-Planck-Straße 1, 21502 Geesthacht, Ger-many

<sup>7</sup> Department of Biomaterials and Cosmetics Chemistry, Faculty of Chemistry, Nicolaus Copernicus University in Toruń, Gagarin 7, 87-100 Toruń, Poland; [alinas@umk.pl](mailto:alinas@umk.pl)

<sup>8</sup> KTH Royal Institute of Technology, School of Engineering Sciences in Chemistry, Biotechnology and Health, Deptment of Chemistry, Surface and Corrosion Science, SE-100 44 Stockholm, Sweden.; [percl@kth.se](mailto:percl@kth.se)

**Table S1.** Distribution of amino acid contacts with HA. Ranking

| Rank | 1  |       | 2  |       | 3 |       | 4 |       | 5 |       | 6 |       | 7 |       | 8 |       | 9 |       | 10 |       | 11 |       | 12 |       |
|------|----|-------|----|-------|---|-------|---|-------|---|-------|---|-------|---|-------|---|-------|---|-------|----|-------|----|-------|----|-------|
|      | #  | %     | #  | %     | # | %     | # | %     | # | %     | # | %     | # | %     | # | %     | # | %     | #  | %     | #  | %     | #  | %     |
| ALA  | 3  | 3.90  | 0  | 0.00  | 0 | 0.00  | 5 | 15.15 | 3 | 5.45  | 0 | 0.00  | 0 | 0.00  | 4 | 13.79 | 0 | 0.00  | 3  | 4.92  | 1  | 2.17  | 3  | 7.89  |
| ARG  | 6  | 7.79  | 5  | 7.04  | 4 | 6.78  | 0 | 0.00  | 4 | 7.27  | 0 | 0.00  | 4 | 6.78  | 1 | 3.45  | 2 | 3.57  | 3  | 4.92  | 1  | 2.17  | 2  | 5.26  |
| ASN  | 2  | 2.60  | 3  | 4.23  | 3 | 5.08  | 0 | 0.00  | 3 | 5.45  | 2 | 5.56  | 2 | 3.39  | 0 | 0.00  | 2 | 3.57  | 1  | 1.64  | 3  | 6.52  | 2  | 5.26  |
| ASP  | 4  | 5.19  | 5  | 7.04  | 5 | 8.47  | 2 | 6.06  | 3 | 5.45  | 2 | 5.56  | 4 | 6.78  | 1 | 3.45  | 4 | 7.14  | 3  | 4.92  | 3  | 6.52  | 0  | 0.00  |
| CYS  | 2  | 2.60  | 2  | 2.82  | 2 | 3.39  | 0 | 0.00  | 2 | 3.64  | 0 | 0.00  | 2 | 3.39  | 0 | 0.00  | 1 | 1.79  | 4  | 6.56  | 0  | 0.00  | 1  | 2.63  |
| GLN  | 4  | 5.19  | 4  | 5.63  | 5 | 8.47  | 3 | 9.09  | 4 | 7.27  | 2 | 5.56  | 5 | 8.47  | 2 | 6.90  | 4 | 7.14  | 5  | 8.20  | 4  | 8.70  | 4  | 10.53 |
| GLU  | 10 | 12.99 | 10 | 14.08 | 7 | 11.86 | 4 | 12.12 | 9 | 16.36 | 4 | 11.11 | 8 | 13.56 | 4 | 13.79 | 7 | 12.50 | 14 | 22.95 | 5  | 10.87 | 8  | 21.05 |
| GLY  | 2  | 2.60  | 1  | 1.41  | 1 | 1.69  | 0 | 0.00  | 0 | 0.00  | 1 | 2.78  | 1 | 1.69  | 0 | 0.00  | 1 | 1.79  | 1  | 1.64  | 1  | 2.17  | 0  | 0.00  |

|       |    |       |    |       |    |       |    |       |    |       |    |       |    |       |    |       |    |       |    |       |    |       |    |       |
|-------|----|-------|----|-------|----|-------|----|-------|----|-------|----|-------|----|-------|----|-------|----|-------|----|-------|----|-------|----|-------|
| HIS   | 4  | 5.19  | 3  | 4.23  | 2  | 3.39  | 1  | 3.03  | 0  | 0.00  | 2  | 5.56  | 3  | 5.08  | 1  | 3.45  | 1  | 1.79  | 2  | 3.28  | 2  | 4.35  | 1  | 2.63  |
| ILE   | 1  | 1.30  | 1  | 1.41  | 0  | 0.00  | 0  | 0.00  | 0  | 0.00  | 0  | 0.00  | 0  | 0.00  | 0  | 0.00  | 0  | 0.00  | 0  | 0.00  | 0  | 0.00  | 0  | 0.00  |
| LEU   | 3  | 3.90  | 3  | 4.23  | 2  | 3.39  | 0  | 0.00  | 5  | 9.09  | 1  | 2.78  | 2  | 3.39  | 1  | 3.45  | 2  | 3.57  | 2  | 3.28  | 0  | 0.00  | 4  | 10.53 |
| LYS   | 8  | 10.39 | 8  | 11.27 | 6  | 10.17 | 5  | 15.15 | 9  | 16.36 | 3  | 8.33  | 6  | 10.17 | 5  | 17.24 | 6  | 10.71 | 11 | 18.03 | 5  | 10.87 | 6  | 15.79 |
| MET   | 0  | 0.00  | 0  | 0.00  | 1  | 1.69  | 0  | 0.00  | 0  | 0.00  | 1  | 2.78  | 0  | 0.00  | 0  | 0.00  | 1  | 1.79  | 0  | 0.00  | 1  | 2.17  | 0  | 0.00  |
| PHE   | 4  | 5.19  | 3  | 4.23  | 2  | 3.39  | 1  | 3.03  | 0  | 0.00  | 1  | 2.78  | 3  | 5.08  | 1  | 3.45  | 3  | 5.36  | 2  | 3.28  | 1  | 2.17  | 0  | 0.00  |
| PRO   | 5  | 6.49  | 6  | 8.45  | 5  | 8.47  | 3  | 9.09  | 3  | 5.45  | 4  | 11.11 | 5  | 8.47  | 3  | 10.34 | 6  | 10.71 | 3  | 4.92  | 5  | 10.87 | 3  | 7.89  |
| SER   | 2  | 2.60  | 1  | 1.41  | 2  | 3.39  | 2  | 6.06  | 2  | 3.64  | 2  | 5.56  | 2  | 3.39  | 1  | 3.45  | 2  | 3.57  | 3  | 4.92  | 2  | 4.35  | 1  | 2.63  |
| THR   | 10 | 12.99 | 10 | 14.08 | 9  | 15.25 | 2  | 6.06  | 6  | 10.91 | 6  | 16.67 | 9  | 15.25 | 2  | 6.90  | 8  | 14.29 | 0  | 0.00  | 7  | 15.22 | 1  | 2.63  |
| TRP   | 0  | 0.00  | 0  | 0.00  | 0  | 0.00  | 0  | 0.00  | 0  | 0.00  | 0  | 0.00  | 0  | 0.00  | 0  | 0.00  | 0  | 0.00  | 0  | 0.00  | 0  | 0.00  | 0  | 0.00  |
| TYR   | 2  | 2.60  | 3  | 4.23  | 2  | 3.39  | 1  | 3.03  | 0  | 0.00  | 2  | 5.56  | 2  | 3.39  | 1  | 3.45  | 2  | 3.57  | 3  | 4.92  | 2  | 4.35  | 0  | 0.00  |
| VAL   | 5  | 6.49  | 3  | 4.23  | 1  | 1.69  | 4  | 12.12 | 2  | 3.64  | 3  | 8.33  | 1  | 1.69  | 2  | 6.90  | 4  | 7.14  | 1  | 1.64  | 3  | 6.52  | 2  | 5.26  |
| Total | 77 |       | 71 |       | 59 |       | 33 |       | 55 |       | 36 |       | 59 |       | 29 |       | 56 |       | 61 |       | 46 |       | 38 |       |

**Table S2.** Distribution of amino acid (AA) in HSA and domain III.

| AA  | No in domain III | % of all AA in domain | No in HSA | % of all in HSA |
|-----|------------------|-----------------------|-----------|-----------------|
| ALA | 17               | 9.34%                 | 58        | 10.74%          |
| ARG | 7                | 3.85%                 | 20        | 3.70%           |
| ASN | 5                | 2.75%                 | 16        | 2.96%           |
| ASP | 8                | 4.40%                 | 33        | 6.11%           |
| CYS | 11               | 6.04%                 | 34        | 6.30%           |
| GLN | 7                | 3.85%                 | 16        | 2.96%           |
| GLU | 17               | 9.34%                 | 60        | 11.11%          |
| GLY | 4                | 2.20%                 | 11        | 2.04%           |

|     |    |        |    |        |
|-----|----|--------|----|--------|
| HIS | 4  | 2.20%  | 15 | 2.78%  |
| ILE | 2  | 1.10%  | 8  | 1.48%  |
| LEU | 17 | 9.34%  | 58 | 10.74% |
| LYS | 22 | 12.09% | 53 | 9.81%  |
| MET | 2  | 1.10%  | 6  | 1.11%  |
| PHE | 7  | 3.85%  | 28 | 5.19%  |
| PRO | 8  | 4.40%  | 22 | 4.07%  |
| SER | 9  | 4.95%  | 23 | 4.26%  |
| THR | 13 | 7.14%  | 25 | 4.63%  |
| TRP | 0  | 0.00%  | 1  | 0.19%  |
| TYR | 3  | 1.65%  | 18 | 3.33%  |
| VAL | 19 | 10.44% | 35 | 6.48%  |
